# Supplementary material
Source: publisher figshare collection journal article supplement (https://future-science-group.figshare.com/ndownloader/files/30807397)
Supplement: Supplementary file 1 [file 30807397]

**Table 1: Cell Cycle Data for A549, Colo699 and SKMES (Mean and Standard Deviation (SD))**

| **A549** | **NT** (mean±SD) | **OIL 10** (mean±SD) | **OIL 15** (mean±SD) | **SIL 10** (mean±SD) | **SIL 15** (mean±SD) | **FOS 10** (mean±SD) | **FOS 15** (mean±SD) |
| --- | --- | --- | --- | --- | --- | --- | --- |
| **M1** | 5.7±1.4 | 7.8±1 | 7.6±0.8 | 9.2±0.7 | 9.8±3.4 | 11±0.8 | 15±8 |
| **M2** | 62.9±3.1 | 68.2±1.9 | 65.7±0.8 | 63.5±1 | 65±2 | 57.4±7 | 52.5±12 |
| **M3** | 13±1.6 | 9.5±0.9 | 9.7±0.8 | 10.8±0.5 | 9±0.7 | 11.2±3 | 12±3.3 |
| **M4** | 18±1.2 | 14.4±2.4 | 17±2.35 | 16.3±0.7 | 16.3±2.2 | 20.3±4 | 20±1.4 |
| **Colo699** | **NT** (mean±SD) | **OIL** **10** (mean±SD) | **OIL 15** (mean±SD) | **SIL 10** (mean±SD) | **SIL 15** (mean±SD) | **FOS 10** (mean±SD) | FOS 15 (mean±SD) |
| **M1** | 5.6±2.6 | 5.2±2.7 | 5.4±2.4 | 6.4±2.5 | 6.7±1.6 | 9±4 | 7±2 |
| **M2** | 66.7±5.6 | 72.4±8.2 | 70.1±7.4 | 67±8 | 70±7.7 | 65±5.7 | 66±4.3 |
| **M3** | 8.9±1.8 | 7.3±2 | 7.3±2 | 8.6±1.9 | 7.9±2 | 9.2±1 | 9.6±2.8 |
| **M4** | 18.7±3.8 | 15.4±5.4 | 17.3±5 | 18±6.3 | 15±5 | 17±4 | 17±4.3 |
| **SKMES** | **NT** (mean±SD) | **OIL** **10** (mean±SD) | **OIL 15** (mean±SD) | **SIL 10** (mean±SD) | **SIL 15** (mean±SD) | **FOS 10** (mean±SD) | FOS 15 (mean±SD) |
| **M1** | 4.18± 1.4 | 4.58±1 | 5.45±0.5 | 5.1±1.6 | 5.3±0.6 | 4.7±0.8 | 7.9±2.6 |
| **M2** | 81±3 | 83.7±2.7 | 81.9±4.2 | 81.7±6.2 | 85.6±1.7 | 85.4±2.9 | 83.65±4.1 |
| **M3** | 5.7±1.2 | 4±0.9 | 4.2±1.2 | 4.66±1.8 | 3±0.66 | 3.76±0.98 | 4.5±2.1 |
| **M4** | 9.2±3.2 | 7.7±2.6 | 8.35±3.3 | 8.32±4.5 | 6±1.3 | 6.2±1.8 | 5.26±1.3 |
